# Supplementary material for: The Proliferating Cell Nuclear Antigen (PCNA) Transcript Variants as Potential Relapse Markers in B-Cell Acute Lymphoblastic Leukemia
Source: MDPI journal article supplement (doi:10.3390/cells11203205), 2022-10-12
Supplement: s1 [file s1]

| Transcript | No of ATG from 5' end | Reliability | Frame | Identity Kozak rule A/GXX-ATGG | Start (bp) | Finish (bp) | ORF Length (aa) | Stop codon found | Sequence                                                                                                                                                                                                                                                                |
|------------|-----------------------|-------------|-------|--------------------------------|------------|-------------|-----------------|------------------|-------------------------------------------------------------------------------------------------------------------------------------------------------------------------------------------------------------------------------------------------------------------------|
| PCNA_V1    | 3                     | 0.90        | 3     | AXXATGt                        | 240        | 1022        | 261             | Yes              | MFEARLVQGSILKKVLEALKDLINEACWDISSGVNLQSMDSH-VSLVQLT-LRSEGFDTYRCDRNLAMGVNLTSMSKILKCAGNEDIITLRAEDNADTLALVFEAPNQEKVSDYEMKLMDL DVEQLGI-PEQEYSCVVKMPSGEFARICRDL SHIGDAVVIS-CAKDGVKFSASGELGNGNIKLSQTSNVDKEEEAVTIEMNEPVQLTFALRYLNFFTKATPLSSTVTLSMSADVPLVVEYKIADMGHLYLAPKIEDEEGS |
| PCNA_V2    | 1                     | 0.90        | 2     | AXXATGt                        | 160        | 943         | 261             | Yes              | MFEARLVQGSILKKVLEALKDLINEACWDISSGVNLQSMDSH-VSLVQLT-LRSEGFDTYRCDRNLAMGVNLTSMSKILKCAGNEDIITLRAEDNADTLALVFEAPNQEKVSDYEMKLMDL DVEQLGI-PEQEYSCVVKMPSGEFARICRDL SHIGDAVVIS-CAKDGVKFSASGELGNGNIKLSQTSNVDKEEEAVTIEMNEPVQLTFALRYLNFFTKATPLSSTVTLSMSADVPLVVEYKIADMGHLYLAPKIEDEEGS |
| PCNA_V3    | 1                     | 0.86        | 3     | AXXATGt                        | 204        | 443         | 80              | Yes              | MFEARLVQGSILKKVLEALKDLINEACWDISSGVNLQSMDSH-VSLVQLTLRSEGFDTYRCDRNLAMGVNLTRNRSTAV                                                                                                                                                                                         |
| PCNA_V4    | 2                     | 0.39        | 1     | cXXATGc                        | 85         | 843         | 253             | Yes              | MLADLGQSSSLTQVSAGRRDVRPLALRLPKPARLSSFP-PACSGVVATPPPCSRRAWS-RAPSSRSMSKILKCAGNEDIITLRAEDNADTLALVFEAPNQEKVSDYEMKLMDL DVEQLGIPEQEYSCVVKMPSGEFARICRDL SHIGDAVVIS-CAKDGVKFSASGELGNGNI-KLSQTSNVDKEEEAVTIEMNEPVQLTFALRYLNFFTKATPLSSTVTLSMSADVPLVVEYKIADMGHLYLAPKIEDEEGS         |
