# Supplementary material for: The Proliferating Cell Nuclear Antigen (PCNA) Transcript Variants as Potential Relapse Markers in B-Cell Acute Lymphoblastic Leukemia
Source: MDPI journal article supplement (doi:10.3390/cells11203205), 2022-10-12
Supplement: s1 [file s1]

| A. RT-PCR and sequencing transcript variants                 |                                         |        |               |
|--------------------------------------------------------------|-----------------------------------------|--------|---------------|
| Transcript                                                   | Primer sequence                         | TM     | Amplicon size |
| RPL4                                                         | Forward: 5' CGAATGAGAGCTGGCAAAGGCAAA 3' | 60°C   | 243 bp        |
|                                                              | Reverse: 5' ACGCCAAGTGCCGTACAATTCATC 3' |        |               |
| PCNA (Fa + Ra)                                               | Forward: 5' ATATTAGCTCCAGCGGTGTAAA 3'   | 55°C   | 613 bp        |
|                                                              | Reverse: 5' ACATCTGCAGACATACTGAGTG 3'   |        |               |
| PCNA1                                                        | Forward: 5'TGGTTCTGGAGGTAACCGG 3'       | 55.5°C | 916 bp        |
|                                                              | Reverse: 5' ACATCTGCAGACATACTGAGTG 3'   |        |               |
| PCNA2                                                        | Forward: 5' ATTAAACGGTTGCAGGCGTAG 3'    | 55.5°C | 858 bp        |
|                                                              | Reverse: 5' ACATCTGCAGACATACTGAGTG 3'   |        |               |
| PCNA3                                                        | Forward: 5' ATTAAACGGTTGCAGGCGTAG 3'    | 54.5°C | 425 bp        |
|                                                              | Reverse: 5' TACTCCTGTTCTGCTGGTGAGGTT 3' |        |               |
| B. 3'RACE System for Rapid Amplification of cDNA Ends RT-PCR |                                         |        |               |
| 3'RACE PCNA3                                                 | Forward: 5' AACCTCACCAGGAACAGGAGTAC 3'  | 60.5°C | 740 bp        |
|                                                              | Reverse: 5' GGCCACGCGTCGACTAGTAC 3'     |        |               |
| 3'RACE PCNA3                                                 | Forward: 5' GCTGTGTAGTAAAGATGCCTTCTG 3' | 60°C   | 726 bp        |
|                                                              | Reverse: 5' GGCCACGCGTCGACTAGTAC 3'     |        |               |

| nested                                                      |                                           |        |        |  |
|-------------------------------------------------------------|-------------------------------------------|--------|--------|--|
| 3'RACE PCNA4                                                | Forward: 5'GCTCCATCCTCAAGAAGTATGTCCAA 3'  |        |        |  |
|                                                             | Reverse: 5' GGCCACGCGTCGACTAGTAC 3'       | 60.5°C | 912 bp |  |
| 3'RACE PCNA4                                                | Forward: 5' ATACTAAAATGCGCCGGCAATGAA 3'   |        |        |  |
| nested                                                      | Reverse: 5' GGCCACGCGTCGACTAGTAC 3'       | 60°C   | 885 bp |  |
| C. Digital droplet RT-PCR expression of transcript variants |                                           |        |        |  |
| RPS18                                                       | Forward: 5' CAGCCAGGTCCTAGCCAATG 3'       |        |        |  |
|                                                             | Reverse: 5' CCCTCTATGGGCCCCGAATCT 3'      | 60°C   | 82 bp  |  |
| PCNA-1q                                                     | Forward: 5' CTGGTTCTGGAGGTAACCGGT 3'      |        |        |  |
|                                                             | Reverse: 5' GACCGGCTGAGACTTGCGTAA 3'      | 60°C   | 116    |  |
| PCNA-2q                                                     | Forward: 5' CATTAAACGGTTGCAGGCGTAGC 3'    |        |        |  |
|                                                             | Reverse: 5' CAACAACGCCGCTACAGGCA 3'       | 60°C   | 148 bp |  |
| PCNA-3q                                                     | Forward: 5' GGGATATTAGCTCCAGCGGTGT 3'     |        |        |  |
|                                                             | Reverse: 5' GTACTCCTGTTCTTGGTGAGGTT 3'    | 60°C   | 151 bp |  |
| PCNA-4q                                                     | Forward: 5' TAGACTTTCCTCCTTCCCGCCTG 3'    |        |        |  |
|                                                             | Reverse: 5' TTGGACATACTTCTTGAGGATGGAGC 3' | 60°C   | 105 bp |  |
