# Supplementary material for: The Proliferating Cell Nuclear Antigen (PCNA) Transcript Variants as Potential Relapse Markers in B-Cell Acute Lymphoblastic Leukemia
Source: MDPI journal article supplement (doi:10.3390/cells11203205), 2022-10-12
Supplement: s1 [file s1]

**Table S3.** Potential posttranslational modifications of PCNA\_V3 and PCNA\_V4.

| Site modification | Description                                                                                         | PCNA_V3 | PCNA_V4 |
|-------------------|-----------------------------------------------------------------------------------------------------|---------|---------|
| <b>14</b>         | N <sup>6</sup> -Acety-L-lysine                                                                      | Lys14   | Gln13   |
| <b>77</b>         | N <sup>6</sup> -Acety-L-lysine                                                                      | -       | Lys77   |
| <b>80</b>         | N <sup>6</sup> -Acety-L-lysine                                                                      | -       | Lys80   |
| <b>164</b>        | Isopeptide glycylisn (Lys-Gly) (binding with G-Cter on SUMO2)<br>(binding with G-Cter in ubiquitin) | -       | Lys164  |
| <b>211</b>        | Phosphotyrosine                                                                                     | -       | Tyr211  |
| <b>248</b>        | N <sup>6</sup> -Acety-L-lysine                                                                      | -       | Lys240  |
| <b>254</b>        | Isopeptide glycylisn (Lys-Gly) (binding with G-Cter on SUMO2)                                       | -       | Lys246  |

**Table S4.** Domains found in the new PCNA transcript variants.

| Domain                        | Site              | PCNA_V3                   | PCNA_V4           |
|-------------------------------|-------------------|---------------------------|-------------------|
| <b>Domain I</b>               | 1-123             | 1-49, 88-94, 103-105      | 1-55, 63-123      |
| <b>Domain II</b>              | 132-258           | 133-143, 180-186, 228-231 | 132-261           |
| <b>IDCL</b>                   | 118-134           | 133-134                   | 118-134           |
| <b>DNA-binding site</b>       | 60-80             | -                         | 63-80             |
| <b>Loop J, Asp113, Gly178</b> | 105-110, 113, 178 | -                         | 105-110, 113, 178 |

**Table S5.** Homology analysis of the novel PCNA transcript variants.

| Model   | Robetta           |                                  | Ramachandran (PROCHECK <sup>24</sup> ) |         |            |
|---------|-------------------|----------------------------------|----------------------------------------|---------|------------|
|         | Aling reliability | Template structure (PDB)         | Favored                                | Allowed | No Allowed |
| PCNA_V3 | 0.9771            | PCNA <i>A. thaliana</i> (2ZVW)   | 85.1%                                  | 14.4%   | 0.5%       |
| PCNA_V4 | 0.7951            | PCNA <i>S. cerevisiae</i> (3K4X) | 87.5%                                  | 12.5%   | 0.0%       |
