# Supplementary material for: The Proliferating Cell Nuclear Antigen (PCNA) Transcript Variants as Potential Relapse Markers in B-Cell Acute Lymphoblastic Leukemia
Source: MDPI journal article supplement (doi:10.3390/cells11203205), 2022-10-12
Supplement: s1 [file s1]

**Table S6.** Clinical characteristics of the patient cohort.

| Variable                                     | Total %     | PCNA_V2 expres-<br>sion           | <i>p value</i> | PCNA_V4 ex-<br>pression           | <i>p value</i> |
|----------------------------------------------|-------------|-----------------------------------|----------------|-----------------------------------|----------------|
| Age                                          |             |                                   |                |                                   |                |
| 0-9                                          | 40 (57.14%) | 13 (18.5%) High<br>27 (38.5%) Low | 0.400          | 17 24.2%) High<br>23 (23.8%) Low  | 0.240          |
| >9                                           | 30 (42.85%) | 7 (10%) High<br>23 (32.8%) Low    |                | 17 (24.2%) High<br>13 (18.5%) Low |                |
| Sex                                          |             |                                   |                |                                   |                |
| Men                                          | 34 (48.6%)  | 12 (17.1%) High<br>22 (31.4%) Low | 0.347          | 27 (38.6) High<br>7 (10.0%) Low   | 0.094          |
| Women                                        | 36 (51.4%)  | 9 (12.9%) High<br>27 (38.6%) Low  |                | 22 (31.4%) High<br>14 (20.0%) Low |                |
| Genetic findings: T(9;22), T(1;19), T(12;21) |             |                                   |                |                                   |                |
| Yes                                          | 7 (10%)     | 3 (4.2%) High<br>4 (5.7%) Low     | 0.433          | 3 (4.2%) High<br>4 (5.7%) Low     | 0.433          |
| Cerebrospinal fluid (blasts %)               |             |                                   |                |                                   |                |
| No blast                                     | 64 (91.4%)  | 19 (27.1%) High<br>45 (64.3%) Low | 0.444          | 45 (64.3%) High<br>19 (27.1%) Low | 0.444          |
| < 5 blast                                    | 2 (2.9%%)   | 0 (0%) High<br>2 (2.9%) Low       |                | 2 (2.9%) High<br>0 (0%) Low       |                |
| > 5 blast                                    | 4 (5.7%)    | 2 (2.9%) High<br>2 (2.9%) Low     |                | 2 (2.9%) High<br>2 (2.9%) Low     |                |
| Treatment response                           |             |                                   |                |                                   |                |
| Good                                         | 45 (64.3%)  | 16 (22.9%) High<br>29 (41.4%) Low | 0.243          | 32 (45.7%) High<br>13 (18.6%) Low | 0.894          |
| Bad                                          | 23 (32.9%)  | 5 (7.1%) High<br>18 (25.7%) Low   |                | 16 (22.9%) High<br>7 (10%) Low    |                |
| Hypodiploidy                                 |             |                                   |                |                                   |                |
| Yes                                          | 23 (32.9%)  | 7 (10%) High<br>16 (22.9%) Low    | 0.955          | 15 (21.4%) High<br>8 (11.4%) Low  | 0.541          |
| No                                           | 47 (67.1%)  | 14 (20.0%) High<br>33 (47.1%) Low |                | 34 (48.6%) High<br>13 (16.6%) Low |                |
| Blast %                                      |             |                                   |                |                                   |                |
| <50                                          | 33 (47.1%)  | 9 (12.9%) High<br>24 (34.3%) Low  | 0.638          | 20 (28.6%) High<br>13 (18.6%) Low | 0.105          |
| >50                                          | 37 (52.9%)  | 12 (17.1%) High<br>25 (35.7%) Low |                | 29 (41.4%) High<br>8 (11.4%) Low  |                |
| Relapse                                      |             |                                   |                |                                   |                |
| Yes                                          | 22 (31.4%)  | 4 (5.7%) High<br>18 (25.7%) Low   | 0.118          | 10 (14.3%) High<br>12 (17.1%) Low | 0.002          |
| No                                           | 48 (68.6%)  | 17 (24.3%) High<br>31 (44.3%) Low |                | 39 (55.7%) High<br>9 (12.9%) Low  |                |
| Status                                       |             |                                   |                |                                   |                |
| Alive                                        | 59 (84.3%)  | 19 (27.1%) High<br>40 (57.1%) Low | 0.351          | 43 (61.4%) High<br>16 (22.9%) Low | 0.223          |
| Died                                         | 11 (15.7%)  | 2 (2.9%) High<br>9 (12.9%) Low    |                | 6 (8.6%) High<br>5 (7.1%) Low     |                |
