# Supplementary material for: The Proliferating Cell Nuclear Antigen (PCNA) Transcript Variants as Potential Relapse Markers in B-Cell Acute Lymphoblastic Leukemia
Source: Cells. 2022 Oct 12;11(20):3205. doi: 10.3390/cells11203205 (PMC9600710; doi:10.3390/cells11203205)
Supplement: Supplementary file 1 [file cells-11-03205-s001.zip]

Archive with 8 entries (8 files):
- Figure S1.tiff
- Figure S2.jpg
- Figure S3.tiff
- Figure S4.tiff
- Table S1.pdf
- Table S2.pdf
- Table S3, S4 and S5.pdf
- Table S6.pdf
